# Supplementary material for: Activation of Canonical BMP4-SMAD7 Signaling Suppresses Breast Cancer Metastasis
Source: Oxford University Press journal article supplement (doi:10.1158/0008-5472.can-19-0743), 2020-01-15
Supplement: 00085472can190743-sup-218245_3_supp_5970961_q2p6dt.docx [file 00085472can190743-sup-218245_3_supp_5970961_q2p6dt.docx]

**SUPPLEMENTARY TABLES:**

**Supplementary Table S2. Low BMP4 expression is observed in a majority of human breast cancer samples**

| **Dataset** | **Sample #** | **Analysis** | **Expression*** | **Significance** | **Reference** |
| --- | --- | --- | --- | --- | --- |
| Sorlie Breast | 85 | LBC vs Normal | -3.388 | 0.026 | ([Sorlie et al., 2001](#_ENREF_10)) |
| Radvanyi Breast | 63 | IDBC vs Normal | -3.16 | 0.003 | ([Radvanyi et al., 2005](#_ENREF_8)) |
| TCGA Breast | 593 | IDBC vs Normal | -2.058 | <0.00001 | ([Cancer Genome Atlas, 2012](#_ENREF_1)) |
| TCGA Breast | 593 | IDBC vs Normal | -2.058 | <0.00001 | ([Cancer Genome Atlas, 2012](#_ENREF_1)) |
| TCGA Breast | 593 | MBC vs Normal | -2.975 | 0.001 | ([Cancer Genome Atlas, 2012](#_ENREF_1)) |
| TCGA Breast | 593 | IBC vs Normal | -2.078 | <0.00001 | ([Cancer Genome Atlas, 2012](#_ENREF_1)) |
| TCGA Breast | 593 | MLDBC vs Normal | -2.007 | 0.012 | ([Cancer Genome Atlas, 2012](#_ENREF_1)) |
| TCGA Breast | 593 | ILBC vs Normal | -1.518 | 0.002 | ([Cancer Genome Atlas, 2012](#_ENREF_1)) |
| Finak Breast | 59 | IBCS vs Normal | -6.907 | <0.00001 | ([Finak et al., 2008](#_ENREF_3)) |
| Curtis Breast | 2136 | MedBC vs Normal | -2.49 | <0.00001 | ([Curtis et al., 2012](#_ENREF_2)) |
| Karnoub Breast | 22 | IDBCS vs Normal | -6.273 | 0.017 | ([Karnoub et al., 2007](#_ENREF_5)) |
| Richardson Breast 2 | 47 | DBC vs Normal | -2.541 | 0.001 | ([Richardson et al., 2006](#_ENREF_9)) |
| Sorlie Breast 2 | 167 | LBC vs Normal | -2.165 | 0.060 | ([Sorlie et al., 2003](#_ENREF_11)) |
| Perou Breast 2 | 65 | LBC vs Normal | -1.466 | 0.119 | ([Perou et al., 2000](#_ENREF_7)) |
| Gluck Breast | 158 | IBC vs Normal | -1.132 | 0.051 | ([Gluck et al., 2012](#_ENREF_4)) |
| Turashvili Breast | 30 | ILBC vs Normal | -1.803 | 0.231 | ([Turashvili et al., 2007](#_ENREF_12)) |
| Ma Breast 4 | 66 | IDBCE vs Normal | 1.027 | 0.562 | ([Ma et al., 2009](#_ENREF_6)) |

* Negative values reflect reduced BMP4 mRNA expression in cancer vs normal tissue

Based on 16 analyses of 12 datasets through Oncomine: www.oncomine.com

Filters = Gene: BMP4, Analysis Type: Cancer vs Normal analysis, Cancer Type: Breast Cancer

LBC, Lobular Breast Carcinoma; IDBC, Invasive Ductal Breast Carcinoma; MBC, Male Breast Carcinoma; IBC, Invasive Breast Carcinoma; MLDBC, Mixed Lobular and Ductal Breast Carcinoma; ILBC, Invasive Lobular Breast Carcinoma; IBCS, Invasive Breast Carcinoma Stroma; MedBC, Medullary Breast Carcinoma; IDBCS, Invasive Ductal Breast Carcinoma Stroma; DBC, Ductal Breast Carcinoma; IDBCE, Invasive Ductal Breast Carcinoma Epithelia

**References for Table S1**

Cancer Genome Atlas, N. (2012). Comprehensive molecular portraits of human breast tumours. Nature *490*, 61-70.

Curtis, C., Shah, S. P., Chin, S. F., Turashvili, G., Rueda, O. M., Dunning, M. J., Speed, D., Lynch, A. G., Samarajiwa, S., Yuan, Y.*, et al.* (2012). The genomic and transcriptomic architecture of 2,000 breast tumours reveals novel subgroups. Nature *486*, 346-352.

Finak, G., Bertos, N., Pepin, F., Sadekova, S., Souleimanova, M., Zhao, H., Chen, H., Omeroglu, G., Meterissian, S., Omeroglu, A.*, et al.* (2008). Stromal gene expression predicts clinical outcome in breast cancer. Nature medicine *14*, 518-527.

Gluck, S., Ross, J. S., Royce, M., McKenna, E. F., Jr., Perou, C. M., Avisar, E., and Wu, L. (2012). TP53 genomics predict higher clinical and pathologic tumor response in operable early-stage breast cancer treated with docetaxel-capecitabine +/- trastuzumab. Breast cancer research and treatment *132*, 781-791.

Karnoub, A. E., Dash, A. B., Vo, A. P., Sullivan, A., Brooks, M. W., Bell, G. W., Richardson, A. L., Polyak, K., Tubo, R., and Weinberg, R. A. (2007). Mesenchymal stem cells within tumour stroma promote breast cancer metastasis. Nature *449*, 557-563.

Ma, X. J., Dahiya, S., Richardson, E., Erlander, M., and Sgroi, D. C. (2009). Gene expression profiling of the tumor microenvironment during breast cancer progression. Breast Cancer Res *11*, R7.

Perou, C. M., Sorlie, T., Eisen, M. B., van de Rijn, M., Jeffrey, S. S., Rees, C. A., Pollack, J. R., Ross, D. T., Johnsen, H., Akslen, L. A.*, et al.* (2000). Molecular portraits of human breast tumours. Nature *406*, 747-752.

Radvanyi, L., Singh-Sandhu, D., Gallichan, S., Lovitt, C., Pedyczak, A., Mallo, G., Gish, K., Kwok, K., Hanna, W., Zubovits, J.*, et al.* (2005). The gene associated with trichorhinophalangeal syndrome in humans is overexpressed in breast cancer. Proceedings of the National Academy of Sciences of the United States of America *102*, 11005-11010.

Richardson, A. L., Wang, Z. C., De Nicolo, A., Lu, X., Brown, M., Miron, A., Liao, X., Iglehart, J. D., Livingston, D. M., and Ganesan, S. (2006). X chromosomal abnormalities in basal-like human breast cancer. Cancer cell *9*, 121-132.

Sorlie, T., Perou, C. M., Tibshirani, R., Aas, T., Geisler, S., Johnsen, H., Hastie, T., Eisen, M. B., van de Rijn, M., Jeffrey, S. S.*, et al.* (2001). Gene expression patterns of breast carcinomas distinguish tumor subclasses with clinical implications. Proceedings of the National Academy of Sciences of the United States of America *98*, 10869-10874.

Sorlie, T., Tibshirani, R., Parker, J., Hastie, T., Marron, J. S., Nobel, A., Deng, S., Johnsen, H., Pesich, R., Geisler, S.*, et al.* (2003). Repeated observation of breast tumor subtypes in independent gene expression data sets. Proceedings of the National Academy of Sciences of the United States of America *100*, 8418-8423.

Turashvili, G., Bouchal, J., Baumforth, K., Wei, W., Dziechciarkova, M., Ehrmann, J., Klein, J., Fridman, E., Skarda, J., Srovnal, J.*, et al.* (2007). Novel markers for differentiation of lobular and ductal invasive breast carcinomas by laser microdissection and microarray analysis. BMC cancer *7*, 55.
